# Supplementary material for: Biochemical, Clinical, and Genetic Characteristics of Mexican Patients with Primary Hypertriglyceridemia, Including the First Case of Hyperchylomicronemia Syndrome Due to GPIHBP1 Deficiency
Source: MDPI journal article supplement (doi:10.3390/ijms24010465), 2022-12-27
Supplement: s1 [file s1]

| Supplementary Table S2. Primers used to amplify the 30 segments studied in this research |                                                  |             |
|------------------------------------------------------------------------------------------|--------------------------------------------------|-------------|
| Exon                                                                                     | Sequence 5' to 3'                                | Length (bp) |
| APOA5                                                                                    |                                                  |             |
| 1-F<br>1-R                                                                               | CAGTTGCCCCTGCAGAGG<br>CTCCCCCAGGGTGGACAG         | 231         |
| 2-F<br>2-R                                                                               | TTCAACGTGGGGGTGTGG<br>AGGCAGCAGAGGCAGGTC         | 285         |
| 3A-Fa<br>3A-R                                                                            | TCAGTGCGCGATGACTTG<br>GGCCACCTGCTCCATCAG         | 342         |
| 3B-F<br>3B-R                                                                             | TGCGGCAGCAACTGAAGC<br>ACCTGCACGCAGCGACTG         | 316         |
| 3C-F<br>3C-R                                                                             | GAGCTGCACCGCAGTGTG<br>GCTGCTGCTGGACCTCCTC        | 319         |
| 3D-F<br>3D-R                                                                             | CGCCAGGACACCTACCTGC<br>CTTCCACCCTCCACCCAAC       | 346         |
| GPIHBP1                                                                                  |                                                  |             |
| 1-F<br>1-R                                                                               | GCTGGGGACCAGTGTGAG<br>TCTTCCTAAGCCCCTGCTG        | 295         |
| 2-F<br>2-R                                                                               | CACGATGCTTGCCCAGAG<br>CCTGCTGGCTTCCATCAC         | 285         |
| 3-F<br>3-R                                                                               | GAACGGGGAGGTGGACAG<br>GGCGGGGTCTCTGAGGTG         | 287         |
| 4-F<br>4-R                                                                               | AACAGAGCCCTGCAGAGCCAC<br>TCCAAATCCATTCTCCAAAGCTG | 438         |
| LMF1                                                                                     |                                                  |             |
| 1-F<br>1-R                                                                               | TCAGCTGTGAGGCAGGGGCAC<br>TAGCCCCGAGCCGGTCCTGG    | 932         |
| 2-F<br>2-R                                                                               | AGACTCTGCCTCCCCTTC<br>CCAGTCTTTCCAAGTGCC         | 510         |
| 3-F<br>3-R                                                                               | CAGGTCCTCCTCGCAGGG<br>AAGGCTGATGGCAGAGGC         | 262         |
| 4-F<br>4-R                                                                               | CAGCCCTGTCTCAAGGAC<br>GGGGGAGGAAGGAAACAG         | 353         |
| 5-F<br>5-R                                                                               | CCTTCGTGGATGGTTCGTC<br>CCAGGGTGTGCAGGACTG        | 255         |
| 6-F<br>6-R                                                                               | GGACCCACAAGCCTCTCCCTAG<br>CTGTAATGCCCCAGGGTCCTC  | 344         |
| 7-F<br>7-R                                                                               | CCTCCCTGCTCCAGGAAGAGAG<br>CCTTGTTCTTGGCACGCTACAC | 431         |

|                                                                                                |                          |     |
|------------------------------------------------------------------------------------------------|--------------------------|-----|
| 8-F                                                                                            | ACCCTTAGGGAGCAGCAGC      | 334 |
| 8-R                                                                                            | GCCTGCACTGTAACCCAC       |     |
| 9-F                                                                                            | CTCAGTAGCCCCTGACCAGGAG   | 423 |
| 9-R                                                                                            | CTTCAGTGGGCGTTCTAGAAACC  |     |
| 10-F                                                                                           | CCCACCTCCAGGAAAGCCTCAG   | 305 |
| 10-R                                                                                           | TGCAGGTACAGGTGGTGGGATC   |     |
| 11-F                                                                                           | GTCTACCTGTGCTCAGGGTGGG   | 439 |
| 11-R                                                                                           | GCTCTCCTCTCCACGTCTCTCTTG |     |
| LPL                                                                                            |                          |     |
| 1-F                                                                                            | GCTGCCCCACTTCTAGCTG      | 330 |
| 1-R                                                                                            | CCCCTTCCAACCTCCTTC       |     |
| 2-F                                                                                            | TCAGAAACAAAAATAGCATCAG   | 389 |
| 2-R                                                                                            | GAGATCCACGTGAGATGTG      |     |
| 3-F                                                                                            | CATTTTCATGCAGGTGTATTG    | 338 |
| 3-R                                                                                            | AAAGAACAGCCGGTTTTTC      |     |
| 4-F                                                                                            | TTTCAGTATTTCTATATTGG     | 316 |
| 4-R                                                                                            | CACACATGTGGGTATTTAAC     |     |
| 5-F                                                                                            | TCAAATGATGAGCAGTGAC      | 396 |
| 5-R                                                                                            | CTGAGTAGGACATTGGGTC      |     |
| 6-F                                                                                            | TCACCTATTTTAGACATGCC     | 397 |
| 6-R                                                                                            | GTACATGTGATGCAGTGAGC     |     |
| 7-F                                                                                            | TGAATTGCCTGACTATTTGG     | 278 |
| 7-R                                                                                            | CTCTCTGCTTCTGCTGCTC      |     |
| 8-F                                                                                            | GTGCATTTTTTAAAATATCCCC   | 397 |
| 8-R                                                                                            | CTCCCTGAATTGTGAAGG       |     |
| 9-F                                                                                            | TATCAAAACAATTACCCAGC     | 356 |
| 9-R                                                                                            | ACTGATTGAATGCTTTGATC     |     |
| F: forward, R: reverse. *For analysis, exon3 of the APOA5 gene was divided into four fragments |                          |     |
